# Supplementary material for: Perinatal Exposure to Neuregulin-1 Results in Disinhibition of Adult Midbrain Dopaminergic Neurons: Implication in Schizophrenia Modeling
Source: PubMed Central journal article supplement (PMC4776181; doi:10.1038/srep22606), 2016-03-03
Supplement: srep22606-s1.pdf [file srep22606-s1.pdf]

# Supplemental Information

## *Perinatal Exposure to Neuregulin-1 Results in Disinhibition of Adult Midbrain Dopaminergic Neurons: Implication in Schizophrenia Modeling*

Hisaaki Namba, Takeshi Okubo, Hiroyuki Nawa

Supple Fig S1; Picrotoxin (PTX) sensitivity of GABA-triggered inward currents in the presence of 10  $\mu$ M CGP52432.

Supple Fig S2; Acute eNRG1 application had no marked influence on single unit activity of nigral dopamine neurons.

## Suppl. Fig. S1

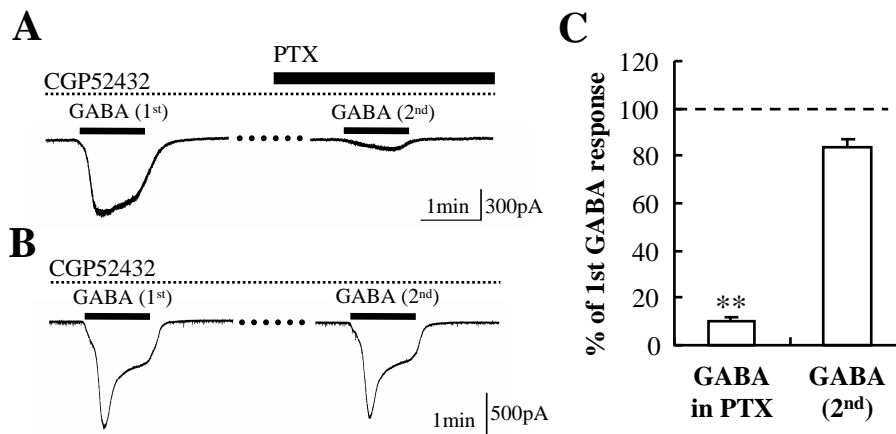

### Suppl. Fig. S1

Picrotoxin (PTX) sensitivity of GABA-triggered inward currents in the presence of 10 μM CGP52432. (A) After recording of the 1st response (GABA(1<sup>st</sup>) in A, C), 1mM GABA was applied to the same cells in the presence of 100 μM PTX (GABA(2<sup>nd</sup>) in A). PTX reduced the second GABA currents to  $10 \pm 2$  % of the 1st ones ( $n = 6$  cells). \*\*:  $p < 0.01$ ; paired t-test. (B, C). Repeated GABA application had no marked influences on the second responses. The amplitude of 2nd GABA currents were diminished to  $84 \pm 3$  % of the 1st ones ( $n = 7$  cells) ( $p = 0.5$  by paired t-test) (B, C).

## Suppl. Fig. S2

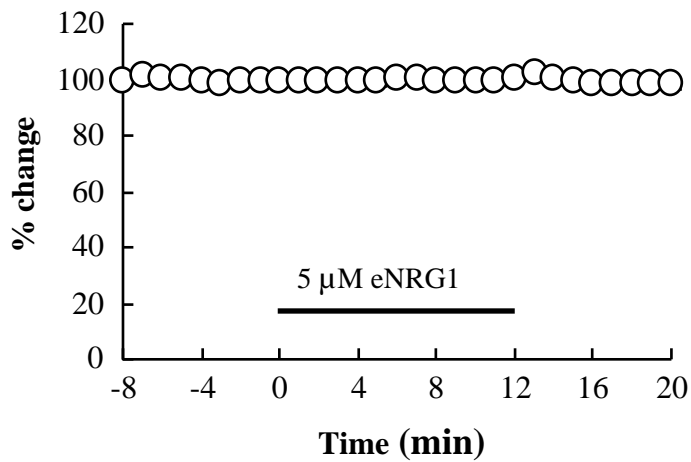

### Suppl. Fig. S2

Acute eNRG1 application had no marked influence on single unit activity of nigral dopamine neurons. Single unit recording was performed recorded at 32 °C from nigral dopaminergic neurons in midbrain slices. Mean basal firing rates for 8 min ( $2.4 \pm 0.3$  Hz) were set at 100 % and compared with the mean frequency at 11-12min in the presence of 5  $\mu$ M eNRG1 ( $n = 6$ ,  $p = 0.9$  (paired t-test)). Horizontal slices were prepared from juvenile mice at postnatal 3 week.
